# Supplementary material
Source: Springer Nature journal article supplement (https://www.springermedizin.de/resource/supplementary/13054_2012_1961_MOESM4_ESM.pdf/9711938)

Figure 4

- Injurious Ventilation - after 2h of ETX
- Protective Ventilation - after 2h of ETX

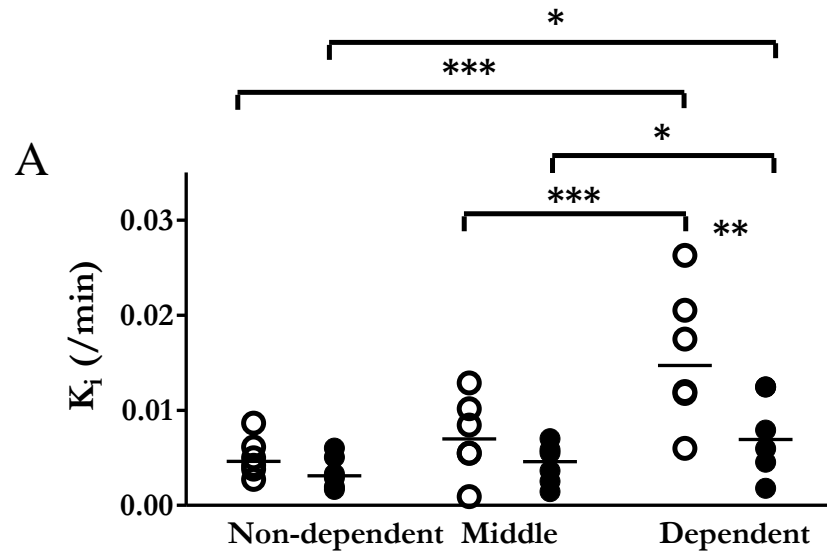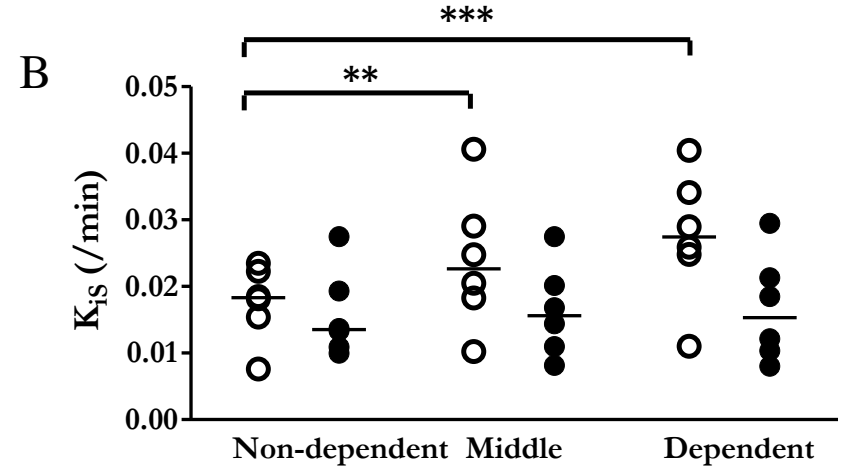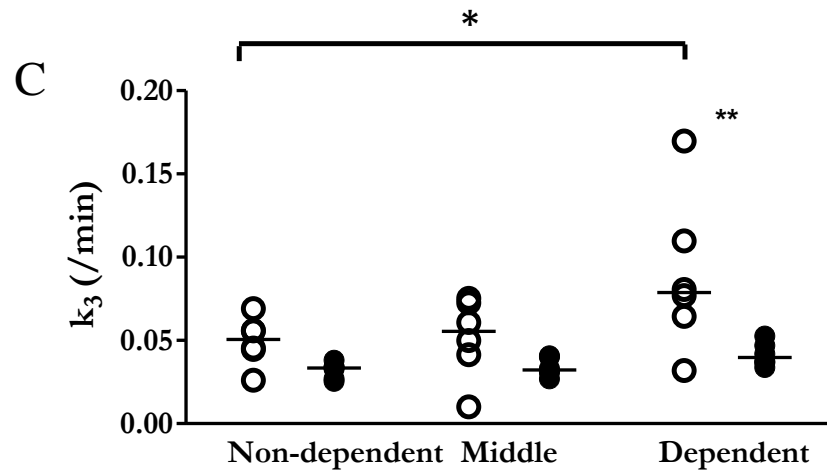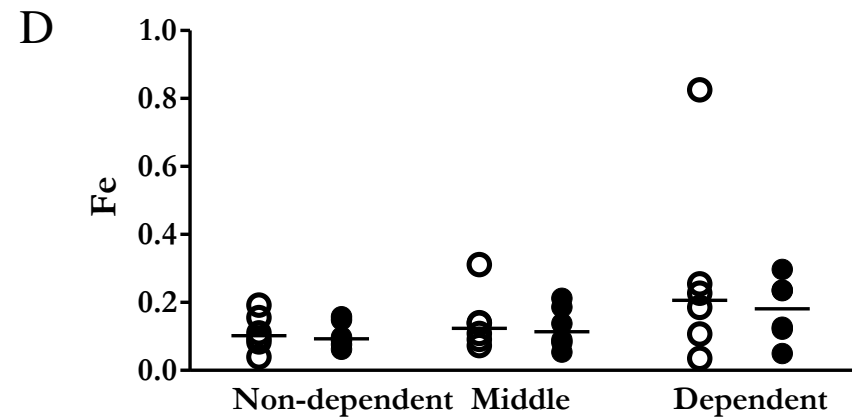

Supplement: MOESM4 [file 9711938]
